# Supplementary material
Source: PubMed Central journal article supplement (PMC7230135)

Fig. S1

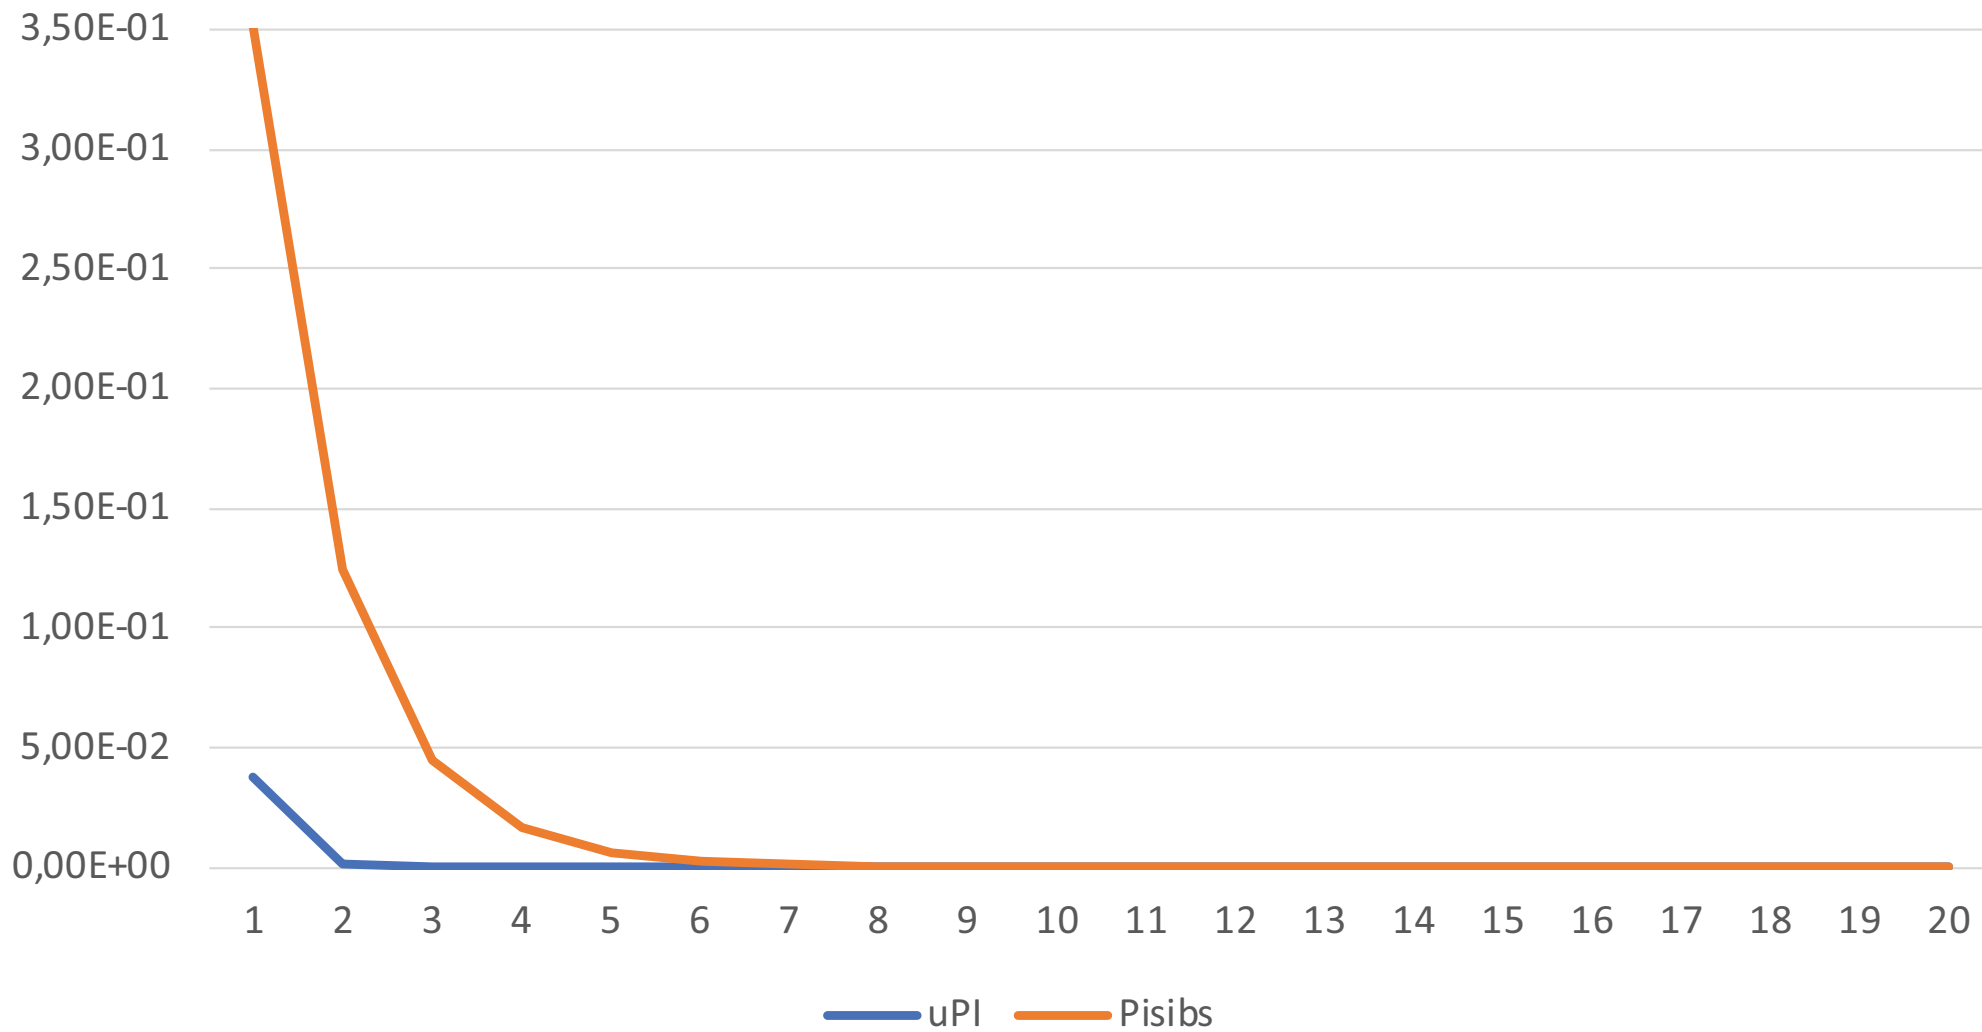

Supplement: 11033_2020_5511_MOESM1_ESM.pdf [file 11033_2020_5511_MOESM1_ESM.pdf]
